# Supplementary material for: Environmental gradients reveal stress hubs pre-dating plant terrestrialization
Source: PubMed Central journal article supplement (PMC10505561; doi:10.1038/s41477-023-01491-0), 2023-08-28
Supplement: 41477_2023_1491_MOESM4_ESM.pdf [file 41477_2023_1491_MOESM4_ESM.pdf]

Lipid spots (January 2023)  
LM: Petrolether:Diethylether:HOAC  
70 : 30 : 0.5

SE 15:0 SE HC4III DL2 FL.KL TAG DAG  
MIX
